# Supplementary material for: A triadic approach to health and dependence in aging adults: incongruence in perception
Source: Springer Nature journal article supplement (doi:10.1007/s11136-018-1950-0), 2018-08-01
Supplement: MOESM1 [file 15995962]

**Annex A**

Extract of the questionnaire addressed to formal and informal caregivers. The questionnaire for older people has the same content but is directly set out for the older person.

**S-1** Do you know the GIR of the older person you are looking after?

- - No
  - Yes
  - 1
  - 2
  - 3
  - 4
  - 5
  - 6

**S-2** What are the illnesses or symptoms of this older person (no more than 5)? *List the 5 main illnesses (from 1 the more important to 5 the less important)*

|  | 1 | 2 | 3 | 4 | 5 |
| --- | --- | --- | --- | --- | --- |
| Diabetes |  |  |  |  |  |
| Hypertension |  |  |  |  |  |
| Cerebrovascular accident |  |  |  |  |  |
| Respiratory diseases |  |  |  |  |  |
| Articular problems |  |  |  |  |  |
| Osteoporosis |  |  |  |  |  |
| Chronic pain |  |  |  |  |  |
| Hearing loss |  |  |  |  |  |
| Visual deficit |  |  |  |  |  |
| Cancer |  |  |  |  |  |
| Renal failure |  |  |  |  |  |
| Heart disease |  |  |  |  |  |
| Digestive problems |  |  |  |  |  |
| Memory problems |  |  |  |  |  |
| Alzheimer’s disease |  |  |  |  |  |
| Parkinson’s disease |  |  |  |  |  |
| Anxiety |  |  |  |  |  |
| Depression |  |  |  |  |  |
| Other (Please specify): |  |  |  |  |  |

**S-3**  Does the older person

|  | *Yes, usually* | *Yes, sometimes* | *No* |
| --- | --- | --- | --- |
| discourse or behave in a logical and sensitive way? |  |  |  |
| monitor the passage of time, times of the day and space location? |  |  |  |

**S-4** Does the older person

|  | | *Does it alone usually* | *Does it in part* | *Does not do* |
| --- | --- | --- | --- | --- |
| maintain his/her body hygiene | for the upper body? |  |  |  |
| for the lower body? |  |  |  |
| get dressed, undressed? | for the upper body? |  |  |  |
| for the middle of the body? |  |  |  |
| for the lower body? |  |  |  |
| get convenience foods? | |  |  |  |
| eat convenience foods? | |  |  |  |
| groom and use the bathroom? | urinary elimination |  |  |  |
| fecal elimination |  |  |  |
| get up, go to bed, sit down? | |  |  |  |
| move inside the place of residence, with or without cane, walker, or wheelchair? | |  |  |  |
| move outside the place of residence from the front door without means of transportation? | |  |  |  |
| Use the means of communication, such as telephone, bells or alarms? | |  |  |  |
| manage his/her business, his/her budget and his/her property, recognize the monetary value of coins and bank notes, use money and know the value of things, carry out administrative procedures, complete forms? | |  |  |  |

**S-4** Does the older person

|  | *Does it alone usually* | *Does it in part* | *Does not do* |
| --- | --- | --- | --- |
| prepare and condition the meals that (s)he is served? |  |  |  |
| do all the current domestic tasks? |  |  |  |
| willingly use public or individual transport? |  |  |  |
| willingly purchase goods? |  |  |  |
| keep to the doctor’s prescription and manage his/her treatment him/herself? |  |  |  |
| participate willingly in leisure activities? |  |  |  |
